# Supplementary material for: Mitochondrial fragmentation and superoxide anion production in coronary endothelial cells from a mouse model of type 1 diabetes
Source: PubMed Central journal article supplement — Diabetologia. 2010 May 13;53(8):1783–94. doi: 10.1007/s00125-010-1770-4 (PMC2892085; doi:10.1007/s00125-010-1770-4), 2010-05-13
Supplement: 125_2010_1770_MOESM2_ESM.pdf [file 125_2010_1770_MOESM2_ESM.pdf]

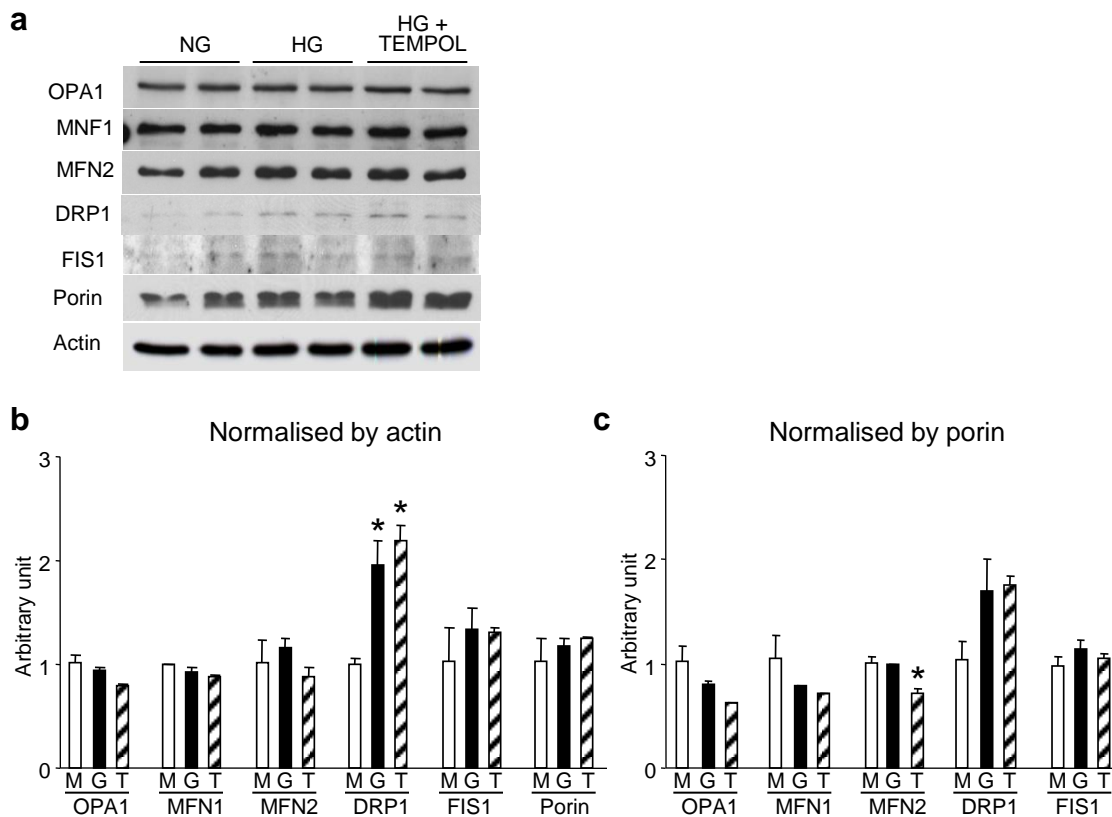

### Electronic supplementary material

**ESM Fig. 2** Change in levels of proteins related with mitochondrial fission–fusion by high-glucose treatment ex vivo and the effect of the  $O_2^-$  scavenger TEMPOL on production of these proteins. **a** Western blots showing OPA1, MNF1 and MNF2 (mitochondrial fusion-related proteins), FIS1 and DRP1 (mitochondrial fission-related proteins), and porin in HCECs. Actin was used as a loading control. **b** Summarised data for protein levels (normalised by actin level) in HCECs. Data are mean $\pm$ SEM from two samples in each group. \* $p$ <0.05 vs control. **c** Summarised data for protein levels (normalised by porin level) in HCECs. Data are mean $\pm$ SEM from two samples in each group. \* $p$ <0.05 vs control
