# Supplementary material for: Mitochondrial fragmentation and superoxide anion production in coronary endothelial cells from a mouse model of type 1 diabetes
Source: PubMed Central journal article supplement — Diabetologia. 2010 May 13;53(8):1783–94. doi: 10.1007/s00125-010-1770-4 (PMC2892085; doi:10.1007/s00125-010-1770-4), 2010-05-13
Supplement: 125_2010_1770_MOESM3_ESM.pdf [file 125_2010_1770_MOESM3_ESM.pdf]

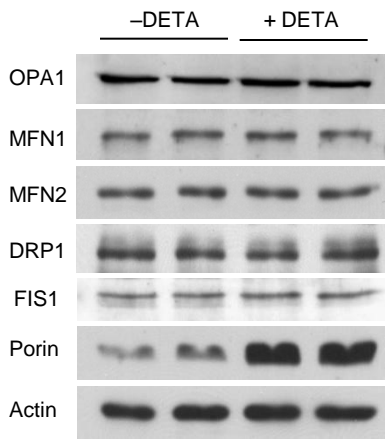

### Electronic supplementary material

**ESM Fig. 3** Change in levels of proteins related with mitochondrial fission–fusion by the cytosolic  $O_2^-$  generator DETA. Western blots showing OPA1, MFN1 and MFN2 (mitochondrial fusion-related proteins), FIS1 and DRP1 (mitochondrial fission-related proteins), and porin in HCECs. Actin was used as a loading control
